# Supplementary material for: Physical Activity Protects Against the Negative Impact of Coronavirus Fear on Adolescent Mental Health and Well-Being During the COVID-19 Pandemic
Source: PubMed Central journal article supplement (PMC7990778; doi:10.3389/fpsyg.2021.580511), 2021-03-11
Supplement: Data_Sheet_1.pdf [file Data_Sheet_1.pdf]

Supplementary Table 1: All items from the Coronavirus Inventory

---

- 1 **To what extent are you concerned about the Coronavirus?**
  - 2 **To what extent do you believe the Coronavirus is prevalent in the UK?**
  - 3 **How likely do you think it is that you could become infected with the Coronavirus?**
  - 4 **How likely is it that someone you know could become infected with the Coronavirus?**
  - 5 **How quickly do you believe the Coronavirus is spreading in the UK?**
  - 6 How much exposure have you had to information about the Coronavirus?
  - 7 **If you did become infected with the Coronavirus, to what extent are you concerned that you will be severely ill?**
  - 8 To what extent has the threat of the Coronavirus influence your decision to be around people?
  - 9 To what extent has the threat of the Coronavirus influenced your travel plans?
  - 10 To what extent has the threat of the Coronavirus influenced your use of safety behaviours (e.g., hand sanitizer)?
  - 11 **To what extent has the threat of the Coronavirus influenced your well-being?**
  - 12 **To what extent has the threat of the Coronavirus increased your stress levels?**
- 

Note: Items in bold are included in the final Coronavirus Inventory
